# Supplementary material for: Comprehensive pan-cancer analysis identified SLC16A3 as a potential prognostic and diagnostic biomarker
Source: Cancer Cell Int. 2025 Apr 29;25:168. doi: 10.1186/s12935-025-03791-1 (PMC12039109; doi:10.1186/s12935-025-03791-1)
Supplement: Supplementary file 7 — Supplementary Material 7: Immunohistochemistry staining of SLC16A3 in human cancers from the Human Protein Atlas (HPA) database. [file 12935_2025_3791_MOESM7_ESM.xlsx]

## Sheet: table (1)
Study of Origin	Sample ID	Cancer Type	Cancer Type Detailed	Protein Change	Annotation	Functional Impact	Mutation Type	Variant Type	Copy #	COSMIC	MS	VS	Center	Chromosome	Start Pos	End Pos	Ref	Var	HGVSg	HGVSc	Allele Freq (T)	Allele Freq (N)	Variant Reads	Ref Reads	Variant Reads (Normal)	Ref Reads (Normal)	# Mut in Sample	Exon	gnomAD	ClinVar	dbSNP	SIGNAL	Diagnosis Age	Neoplasm Disease Stage American Joint Committee on Cancer Code	American Joint Committee on Cancer Publication Version Type	Aneuploidy Score	TCGA PanCanAtlas Cancer Type Acronym	Last Communication Contact from Initial Pathologic Diagnosis Date	Birth from Initial Pathologic Diagnosis Date	Last Alive Less Initial Pathologic Diagnosis Date Calculated Day Value	Disease Free (Months)	Disease Free Status	Months of disease-specific survival	Disease-specific Survival status	Ethnicity Category	Form completion date	Fraction Genome Altered	Neoplasm Histologic Grade	Neoadjuvant Therapy Type Administered Prior To Resection Text
Sarcoma (TCGA, PanCancer Atlas)	TCGA-IE-A3OV-01	Sarcoma	Leiomyosarcoma	CIZ1-SLC16A3 Fusion	OncoKB: Unknown, level NA, resistance NA;CIViC: NA;MyCancerGenome: not present;CancerHotspot: no;3DHotspot: no	MutationAssessor: NA;SIFT: NA;Polyphen-2: NA	fusion	NA	ShallowDel		SOMATIC		N/A	9	128176351												31						42			17	SARC		-15607	0	16.1094	1:Recurred/Progressed	80.4813	1:DEAD WITH TUMOR	Not Hispanic Or Latino	2007-06-12	0.6659		No
Lung Adenocarcinoma (TCGA, PanCancer Atlas)	TCGA-55-A48Y-01	Non-Small Cell Lung Cancer	Lung Adenocarcinoma	SLC16A3-AKAP10 Fusion	OncoKB: Unknown, level NA, resistance NA;CIViC: NA;MyCancerGenome: not present;CancerHotspot: no;3DHotspot: no	MutationAssessor: NA;SIFT: NA;Polyphen-2: NA	fusion	NA	Diploid		SOMATIC		N/A	17	82229106												313						69	STAGE IIA	7TH	6	LUAD	630	-25384	0	20.7121	0:DiseaseFree	20.7121	0:ALIVE OR DEAD TUMOR FREE	Not Hispanic Or Latino	2/21/13	0.1886		No
Brain Lower Grade Glioma (TCGA, PanCancer Atlas)	TCGA-FG-8182-01	Glioma	Oligodendroglioma	A127T	OncoKB: NA;CIViC: NA;MyCancerGenome: not present;CancerHotspot: no;3DHotspot: no	MutationAssessor: impact: medium, score: 3.425;SIFT: impact: deleterious, score: 0;Polyphen-2: impact: probably_damaging, score: 0.909	Missense_Mutation	SNP	Diploid		.	.	.	17	80195025	80195025	G	A	17:g.80195025G>A	ENST00000392339.1:c.379G>A	0.18		4	18		16	29	45021					35			2	LGG	416	-12972	0			13.6766	0:ALIVE OR DEAD TUMOR FREE	Not Hispanic Or Latino	2006-07-12	0.0195	G2	No
Ovarian Serous Cystadenocarcinoma (TCGA, PanCancer Atlas)	TCGA-13-2065-01	Ovarian Epithelial Tumor	Serous Ovarian Cancer	Q51E	OncoKB: NA;CIViC: NA;MyCancerGenome: not present;CancerHotspot: no;3DHotspot: no	MutationAssessor: impact: neutral, score: -0.59;SIFT: impact: tolerated, score: 1;Polyphen-2: impact: benign, score: 0.027	Missense_Mutation	SNP	Gain	1	.	.	.	17	80194035	80194035	C	G	17:g.80194035C>G	ENST00000392339.1:c.151C>G	0.25		50	148		128	46	44962					71			19	OV	1993	-25973	0	31.101	1:Recurred/Progressed	65.5226	0:ALIVE OR DEAD TUMOR FREE		2002-02-10	0.6031	G3	No
Glioblastoma Multiforme (TCGA, PanCancer Atlas)	TCGA-06-5416-01	Glioblastoma	Glioblastoma Multiforme	L96I	OncoKB: NA;CIViC: NA;MyCancerGenome: not present;CancerHotspot: no;3DHotspot: no	MutationAssessor: impact: medium, score: 2;SIFT: impact: tolerated, score: 0.13;Polyphen-2: impact: possibly_damaging, score: 0.903	Missense_Mutation	SNP	Diploid		.	.	.	17	80194667	80194667	C	A	17:g.80194667C>A	ENST00000392339.1:c.286C>A	0.17		38	188		166	12175	44990					23			8	GBM	204	-8533	0			6.70678	0:ALIVE OR DEAD TUMOR FREE	Not Hispanic Or Latino	1/24/11	0.2617		No
Diffuse Large B-Cell Lymphoma (TCGA, PanCancer Atlas)	TCGA-FA-8693-01	Mature B-Cell Neoplasms	Diffuse Large B-Cell Lymphoma, NOS	I330V	OncoKB: NA;CIViC: NA;MyCancerGenome: not present;CancerHotspot: no;3DHotspot: no	MutationAssessor: impact: neutral, score: 0.615;SIFT: NA;Polyphen-2: NA	Missense_Mutation	SNP	Diploid		.	.	.	17	80195634	80195634	A	G	17:g.80195634A>G	ENST00000392339.1:c.988A>G	0.21		4	15		32	171	45021					75		7TH	0	DLBC	132	-27468	0	4.33968	0:DiseaseFree	4.33968	0:ALIVE OR DEAD TUMOR FREE	Not Hispanic Or Latino	2009-12-12	0.0105		No
Bladder Urothelial Carcinoma (TCGA, PanCancer Atlas)	TCGA-DK-A3WW-01	Bladder Cancer	Bladder Urothelial Carcinoma	X375_splice	OncoKB: NA;CIViC: NA;MyCancerGenome: not present;CancerHotspot: no;3DHotspot: no	MutationAssessor: NA;SIFT: NA;Polyphen-2: NA	Splice_Site	SNP	Diploid		.	.	.	17	80196577	80196577	G	A	17:g.80196577G>A	ENST00000392339.1:c.1124-1G>A	0.31		9	20		30	1079						57	STAGE III	7TH	0	BLCA	633	-20909	0	20.8107	0:DiseaseFree	20.8107	0:ALIVE OR DEAD TUMOR FREE	Not Hispanic Or Latino	8/31/12	0.0047	High Grade	No
Bladder Urothelial Carcinoma (TCGA, PanCancer Atlas)	TCGA-ZF-A9RG-01	Bladder Cancer	Bladder Urothelial Carcinoma	H459Y	OncoKB: NA;CIViC: NA;MyCancerGenome: not present;CancerHotspot: no;3DHotspot: no	MutationAssessor: impact: low, score: 1.39;SIFT: NA;Polyphen-2: NA	Missense_Mutation	SNP	Diploid		.	.	.	17	80196829	80196829	C	T	17:g.80196829C>T	ENST00000392339.1:c.1375C>T	0.11		5	40		63	218	45051					70	STAGE III	7TH	19	BLCA	1786	-25656	0	14.4656	1:Recurred/Progressed	58.7172	0:ALIVE OR DEAD TUMOR FREE	Not Hispanic Or Latino	11/15/14	0.0927	High Grade	No
Bladder Urothelial Carcinoma (TCGA, PanCancer Atlas)	TCGA-DK-A2I1-01	Bladder Cancer	Bladder Urothelial Carcinoma	G3W	OncoKB: NA;CIViC: NA;MyCancerGenome: not present;CancerHotspot: no;3DHotspot: no	MutationAssessor: impact: low, score: 1.5;SIFT: impact: deleterious, score: 0;Polyphen-2: impact: possibly_damaging, score: 0.892	Missense_Mutation	SNP	Gain		.	.	.	17	80193891	80193891	G	T	17:g.80193891G>T	ENST00000392339.1:c.7G>T	0.09		3	29		46	708	44962					73	STAGE II	6TH	23	BLCA	546	-26726	0	17.9505	0:DiseaseFree	17.9505	0:ALIVE OR DEAD TUMOR FREE	Not Hispanic Or Latino	11/22/11	0.6916	High Grade	No
Prostate Adenocarcinoma (TCGA, PanCancer Atlas)	TCGA-V1-A9OY-01	Prostate Cancer	Prostate Adenocarcinoma	V249A	OncoKB: NA;CIViC: NA;MyCancerGenome: not present;CancerHotspot: no;3DHotspot: no	MutationAssessor: impact: medium, score: 2.485;SIFT: impact: deleterious, score: 0;Polyphen-2: impact: possibly_damaging, score: 0.604	Missense_Mutation	SNP	Diploid		.	.	.	17	80195392	80195392	T	C	17:g.80195392T>C	ENST00000392339.1:c.746T>C	0.17		7	34		22	16	45021					57			0	PRAD	1067	-21170		35.0791	0:DiseaseFree	35.0791	0:ALIVE OR DEAD TUMOR FREE		7/23/14	0.0229		No
Thymoma (TCGA, PanCancer Atlas)	TCGA-5U-AB0E-01	Thymic Epithelial Tumor	Thymoma	L266Q	OncoKB: NA;CIViC: NA;MyCancerGenome: not present;CancerHotspot: no;3DHotspot: no	MutationAssessor: impact: high, score: 3.825;SIFT: impact: deleterious, score: 0;Polyphen-2: impact: probably_damaging, score: 1	Missense_Mutation	SNP	ShallowDel		.	.	.	17	80195443	80195443	T	A	17:g.80195443T>A	ENST00000392339.1:c.797T>A	0.29		17	41		127	22	45021					62			20	THYM	687	-22716	0			22.5861	0:ALIVE OR DEAD TUMOR FREE	Hispanic Or Latino		0.0813		No
Uterine Corpus Endometrial Carcinoma (TCGA, PanCancer Atlas)	TCGA-D1-A1O7-01	Endometrial Cancer	Uterine Endometrioid Carcinoma	E8K	OncoKB: NA;CIViC: NA;MyCancerGenome: not present;CancerHotspot: no;3DHotspot: no	MutationAssessor: impact: neutral, score: 0.205;SIFT: impact: tolerated, score: 0.29;Polyphen-2: impact: benign, score: 0.037	Missense_Mutation	SNP	Diploid		.	.	.	17	80193906	80193906	G	A	17:g.80193906G>A	ENST00000392339.1:c.22G>A	0.33		26	52		50	328	44962					60		2009	0	UCEC	32	-22037	0	1.05204	0:DiseaseFree	1.05204	0:ALIVE OR DEAD TUMOR FREE	Not Hispanic Or Latino	2010-11-11	0	G1	No
Uterine Corpus Endometrial Carcinoma (TCGA, PanCancer Atlas)	TCGA-EY-A215-01	Endometrial Cancer	Uterine Endometrioid Carcinoma	V322M	OncoKB: NA;CIViC: NA;MyCancerGenome: not present;CancerHotspot: no;3DHotspot: no	MutationAssessor: impact: medium, score: 2.045;SIFT: NA;Polyphen-2: NA	Missense_Mutation	SNP	Diploid	1	.	.	.	17	80195610	80195610	G	A	17:g.80195610G>A	ENST00000392339.1:c.964G>A	0.39		29	46		81	4646	45021					60		2009	0	UCEC	574	-22076	0	18.871	0:DiseaseFree	18.871	0:ALIVE OR DEAD TUMOR FREE	Not Hispanic Or Latino	2007-08-11	0.0013	G3	No
Uterine Corpus Endometrial Carcinoma (TCGA, PanCancer Atlas)	TCGA-B5-A3FC-01	Endometrial Cancer	Uterine Endometrioid Carcinoma	G306S	OncoKB: NA;CIViC: NA;MyCancerGenome: not present;CancerHotspot: no;3DHotspot: no	MutationAssessor: impact: medium, score: 3.01;SIFT: NA;Polyphen-2: NA	Missense_Mutation	SNP	Diploid	1	.	.	.	17	80195562	80195562	G	A	17:g.80195562G>A	ENST00000392339.1:c.916G>A	0.4		55	81		215	12205	45021					53		1988	0	UCEC	2185	-19422	0			71.8348	0:ALIVE OR DEAD TUMOR FREE	Not Hispanic Or Latino	3/23/12	0.0043	G3	No
Uterine Corpus Endometrial Carcinoma (TCGA, PanCancer Atlas)	TCGA-AX-A2HD-01	Endometrial Cancer	Uterine Endometrioid Carcinoma	R84C	OncoKB: NA;CIViC: NA;MyCancerGenome: not present;CancerHotspot: no;3DHotspot: no	MutationAssessor: impact: medium, score: 3.15;SIFT: impact: deleterious, score: 0;Polyphen-2: impact: probably_damaging, score: 0.967	Missense_Mutation	SNP	Diploid		.	.	.	17	80194631	80194631	C	T	17:g.80194631C>T	ENST00000392339.1:c.250C>T	0.64	0.03	27	15	1	29	7838	44990					69		1988	0	UCEC	1414	-25499	0			46.4872	0:ALIVE OR DEAD TUMOR FREE	Not Hispanic Or Latino	10/26/11	0.03	G3	No
Uterine Corpus Endometrial Carcinoma (TCGA, PanCancer Atlas)	TCGA-FI-A2D0-01	Endometrial Cancer	Uterine Endometrioid Carcinoma	G320S	OncoKB: NA;CIViC: NA;MyCancerGenome: not present;CancerHotspot: no;3DHotspot: no	MutationAssessor: impact: low, score: 1.01;SIFT: NA;Polyphen-2: NA	Missense_Mutation	SNP	Diploid		.	.	.	17	80195604	80195604	G	A	17:g.80195604G>A	ENST00000392339.1:c.958G>A	0.3		26	61		115	6448	45021					55		1988	0	UCEC	1023	-20393	0	39.879	0:DiseaseFree	39.879	0:ALIVE OR DEAD TUMOR FREE	Not Hispanic Or Latino	10/28/11	0	G3	No
Uterine Corpus Endometrial Carcinoma (TCGA, PanCancer Atlas)	TCGA-A5-A2K3-01	Endometrial Cancer	Uterine Serous Carcinoma/Uterine Papillary Serous Carcinoma	G319S	OncoKB: NA;CIViC: NA;MyCancerGenome: not present;CancerHotspot: no;3DHotspot: no	MutationAssessor: impact: neutral, score: 0.605;SIFT: NA;Polyphen-2: NA	Missense_Mutation	SNP	Diploid		.	.	.	17	80195601	80195601	G	A	17:g.80195601G>A	ENST00000392339.1:c.955G>A	0.18		16	73		80	1232	45021					68		2009	18	UCEC	2012	-24907	0	66.1472	0:DiseaseFree	66.1472	0:ALIVE OR DEAD TUMOR FREE	Not Hispanic Or Latino	2010-04-11	0.0559	G3	No
Uterine Corpus Endometrial Carcinoma (TCGA, PanCancer Atlas)	TCGA-AJ-A3EM-01	Endometrial Cancer	Uterine Endometrioid Carcinoma	R139L	OncoKB: NA;CIViC: NA;MyCancerGenome: not present;CancerHotspot: no;3DHotspot: no	MutationAssessor: impact: low, score: 1.375;SIFT: impact: tolerated, score: 0.26;Polyphen-2: impact: benign, score: 0.053	Missense_Mutation	SNP	Gain		.	.	.	17	80195062	80195062	G	T	17:g.80195062G>T	ENST00000392339.1:c.416G>T	0.25		6	18		24	50	45021					69		2009	19	UCEC	677	-25557	0	22.2573	0:DiseaseFree	22.2573	0:ALIVE OR DEAD TUMOR FREE		2/15/12	0.6265	G3	No
Uterine Corpus Endometrial Carcinoma (TCGA, PanCancer Atlas)	TCGA-AP-A1DO-01	Endometrial Cancer	Uterine Endometrioid Carcinoma	R224Q	OncoKB: NA;CIViC: NA;MyCancerGenome: not present;CancerHotspot: no;3DHotspot: no	MutationAssessor: impact: low, score: 1.3;SIFT: impact: deleterious, score: 0.03;Polyphen-2: impact: benign, score: 0.011	Missense_Mutation	SNP	Diploid		.	.	.	17	80195317	80195317	G	A	17:g.80195317G>A	ENST00000392339.1:c.671G>A	0.34		11	21		45	546	45021					62		2009	9	UCEC	952	-22787	0	31.2983	0:DiseaseFree	31.2983	0:ALIVE OR DEAD TUMOR FREE	Not Hispanic Or Latino	2005-09-11	0.2144	G2	No
Uterine Corpus Endometrial Carcinoma (TCGA, PanCancer Atlas)	TCGA-AX-A2HC-01	Endometrial Cancer	Uterine Endometrioid Carcinoma	S236L	OncoKB: NA;CIViC: NA;MyCancerGenome: not present;CancerHotspot: no;3DHotspot: no	MutationAssessor: impact: neutral, score: 0.545;SIFT: impact: tolerated, score: 0.12;Polyphen-2: impact: benign, score: 0.342	Missense_Mutation	SNP	Diploid		.	.	.	17	80195353	80195353	C	T	17:g.80195353C>T	ENST00000392339.1:c.707C>T	0.54	0.01	44	37	1	98	12979	45021					53		1988	4	UCEC	1044	-19485	0	24.8545	1:Recurred/Progressed	34.3229	0:ALIVE OR DEAD TUMOR FREE	Not Hispanic Or Latino	2011-01-11	0.0764	G3	No
Uterine Corpus Endometrial Carcinoma (TCGA, PanCancer Atlas)	TCGA-E6-A1LX-01	Endometrial Cancer	Uterine Endometrioid Carcinoma	A393V	OncoKB: NA;CIViC: NA;MyCancerGenome: not present;CancerHotspot: no;3DHotspot: no	MutationAssessor: impact: low, score: 1.01;SIFT: NA;Polyphen-2: NA	Missense_Mutation	SNP	Diploid		.	.	.	17	80196632	80196632	C	T	17:g.80196632C>T	ENST00000392339.1:c.1178C>T	0.21		5	19		15	12694	45051					40		1988	1	UCEC	711	-14731	0	23.3751	0:DiseaseFree	23.3751	0:ALIVE OR DEAD TUMOR FREE	Not Hispanic Or Latino	2006-07-11	0.0112	G3	No
Uterine Corpus Endometrial Carcinoma (TCGA, PanCancer Atlas)	TCGA-EO-A22U-01	Endometrial Cancer	Uterine Endometrioid Carcinoma	V192M	OncoKB: NA;CIViC: NA;MyCancerGenome: not present;CancerHotspot: no;3DHotspot: no	MutationAssessor: impact: medium, score: 3.395;SIFT: impact: deleterious, score: 0.02;Polyphen-2: impact: probably_damaging, score: 0.919	Missense_Mutation	SNP	Diploid		.	.	.	17	80195220	80195220	G	A	17:g.80195220G>A	ENST00000392339.1:c.574G>A	0.73		16	6		11	13822	45021					83		2009	0	UCEC	1407	-30557	0	46.257	0:DiseaseFree	46.257	0:ALIVE OR DEAD TUMOR FREE		10/26/11	0.0004	G3	No
Uterine Corpus Endometrial Carcinoma (TCGA, PanCancer Atlas)	TCGA-EO-A22U-01	Endometrial Cancer	Uterine Endometrioid Carcinoma	R226H	OncoKB: NA;CIViC: NA;MyCancerGenome: not present;CancerHotspot: no;3DHotspot: no	MutationAssessor: impact: medium, score: 3.285;SIFT: impact: deleterious, score: 0;Polyphen-2: impact: probably_damaging, score: 0.94	Missense_Mutation	SNP	Diploid		.	.	.	17	80195323	80195323	G	A	17:g.80195323G>A	ENST00000392339.1:c.677G>A	0.4		35	52		42	13822	45021					83		2009	0	UCEC	1407	-30557	0	46.257	0:DiseaseFree	46.257	0:ALIVE OR DEAD TUMOR FREE		10/26/11	0.0004	G3	No
Uterine Corpus Endometrial Carcinoma (TCGA, PanCancer Atlas)	TCGA-EO-A22U-01	Endometrial Cancer	Uterine Endometrioid Carcinoma	V247M	OncoKB: NA;CIViC: NA;MyCancerGenome: not present;CancerHotspot: no;3DHotspot: no	MutationAssessor: impact: medium, score: 2.755;SIFT: impact: deleterious, score: 0;Polyphen-2: impact: probably_damaging, score: 0.982	Missense_Mutation	SNP	Diploid		.	.	.	17	80195385	80195385	G	A	17:g.80195385G>A	ENST00000392339.1:c.739G>A	0.4		53	81		66	13822	45021					83		2009	0	UCEC	1407	-30557	0	46.257	0:DiseaseFree	46.257	0:ALIVE OR DEAD TUMOR FREE		10/26/11	0.0004	G3	No
Uterine Corpus Endometrial Carcinoma (TCGA, PanCancer Atlas)	TCGA-EO-A22U-01	Endometrial Cancer	Uterine Endometrioid Carcinoma	V284M	OncoKB: NA;CIViC: NA;MyCancerGenome: not present;CancerHotspot: no;3DHotspot: no	MutationAssessor: impact: medium, score: 2.58;SIFT: impact: tolerated, score: 0.06;Polyphen-2: impact: possibly_damaging, score: 0.771	Missense_Mutation	SNP	Diploid		.	.	.	17	80195496	80195496	G	A	17:g.80195496G>A	ENST00000392339.1:c.850G>A	0.29		39	94		58	13822	45021					83		2009	0	UCEC	1407	-30557	0	46.257	0:DiseaseFree	46.257	0:ALIVE OR DEAD TUMOR FREE		10/26/11	0.0004	G3	No
Uterine Corpus Endometrial Carcinoma (TCGA, PanCancer Atlas)	TCGA-EO-A22U-01	Endometrial Cancer	Uterine Endometrioid Carcinoma	K431Q	OncoKB: NA;CIViC: NA;MyCancerGenome: not present;CancerHotspot: no;3DHotspot: no	MutationAssessor: impact: low, score: 0.805;SIFT: NA;Polyphen-2: NA	Missense_Mutation	SNP	Diploid		.	.	.	17	80196745	80196745	A	C	17:g.80196745A>C	ENST00000392339.1:c.1291A>C	0.39		25	39		27	13822	45051					83		2009	0	UCEC	1407	-30557	0	46.257	0:DiseaseFree	46.257	0:ALIVE OR DEAD TUMOR FREE		10/26/11	0.0004	G3	No
Uterine Corpus Endometrial Carcinoma (TCGA, PanCancer Atlas)	TCGA-FI-A2D5-01	Endometrial Cancer	Uterine Endometrioid Carcinoma	R215Q	OncoKB: NA;CIViC: NA;MyCancerGenome: not present;CancerHotspot: no;3DHotspot: no	MutationAssessor: impact: neutral, score: 0.475;SIFT: impact: tolerated, score: 0.13;Polyphen-2: impact: benign, score: 0.011	Missense_Mutation	SNP	Diploid		.	.	.	17	80195290	80195290	G	A	17:g.80195290G>A	ENST00000392339.1:c.644G>A	0.14		10	62		41	13853	45021					56		2009	0	UCEC		-20666	0			13.8409	1:DEAD WITH TUMOR	Not Hispanic Or Latino	10/28/11	0.0005	G3	No
Lung Adenocarcinoma (TCGA, PanCancer Atlas)	TCGA-64-5778-01	Non-Small Cell Lung Cancer	Lung Adenocarcinoma	C81*	OncoKB: NA;CIViC: NA;MyCancerGenome: not present;CancerHotspot: no;3DHotspot: no	MutationAssessor: NA;SIFT: NA;Polyphen-2: NA	Nonsense_Mutation	SNP	Diploid	1	.	.	.	17	80194624	80194624	C	A	17:g.80194624C>A	ENST00000392339.1:c.243C>A	0.3		23	53		84	420	44990					60	STAGE IB	6TH	10	LUAD	1305	-21927	0	31.6271	1:Recurred/Progressed	42.9036	0:ALIVE OR DEAD TUMOR FREE	Not Hispanic Or Latino	2005-02-11	0.3264		No
Lung Adenocarcinoma (TCGA, PanCancer Atlas)	TCGA-55-8085-01	Non-Small Cell Lung Cancer	Lung Adenocarcinoma	I63M	OncoKB: NA;CIViC: NA;MyCancerGenome: not present;CancerHotspot: no;3DHotspot: no	MutationAssessor: impact: medium, score: 2.89;SIFT: impact: deleterious, score: 0;Polyphen-2: impact: possibly_damaging, score: 0.857	Missense_Mutation	SNP	Diploid		.	.	.	17	80194073	80194073	C	G	17:g.80194073C>G	ENST00000392339.1:c.189C>G	0.29		33	81		121	224	44962					64	STAGE IA	7TH	6	LUAD	904	-23596	0	29.7202	0:DiseaseFree	29.7202	0:ALIVE OR DEAD TUMOR FREE	Not Hispanic Or Latino	6/15/12	0.2779		No
Lung Adenocarcinoma (TCGA, PanCancer Atlas)	TCGA-86-8358-01	Non-Small Cell Lung Cancer	Lung Adenocarcinoma	S133L	OncoKB: NA;CIViC: NA;MyCancerGenome: not present;CancerHotspot: no;3DHotspot: no	MutationAssessor: impact: medium, score: 3.175;SIFT: impact: deleterious, score: 0.04;Polyphen-2: impact: benign, score: 0.274	Missense_Mutation	SNP	Gain		.	.	.	17	80195044	80195044	C	T	17:g.80195044C>T	ENST00000392339.1:c.398C>T	0.4		4	6		12	951	45021					44	STAGE IB	7TH	21	LUAD	653	-16409	0	21.4683	0:DiseaseFree	21.4683	0:ALIVE OR DEAD TUMOR FREE	Not Hispanic Or Latino	2007-06-12	0.5293		No
Skin Cutaneous Melanoma (TCGA, PanCancer Atlas)	TCGA-EB-A24D-01	Melanoma	Cutaneous Melanoma	M102L	OncoKB: NA;CIViC: NA;MyCancerGenome: not present;CancerHotspot: no;3DHotspot: no	MutationAssessor: impact: low, score: 1.415;SIFT: impact: tolerated, score: 0.32;Polyphen-2: impact: probably_damaging, score: 0.972	Missense_Mutation	SNP		1	.	.	.	17	80194685	80194685	A	C	17:g.80194685A>C	ENST00000392339.1:c.304A>C	0.6		62	41		73	697	44990					72	STAGE IIIB	7TH	29	SKCM	645	-26439	0			21.2052	0:ALIVE OR DEAD TUMOR FREE	Not Hispanic Or Latino	2009-12-12	0.6057		No
Skin Cutaneous Melanoma (TCGA, PanCancer Atlas)	TCGA-EE-A20F-06	Melanoma	Cutaneous Melanoma	E442K	OncoKB: NA;CIViC: NA;MyCancerGenome: not present;CancerHotspot: no;3DHotspot: no	MutationAssessor: impact: medium, score: 2.485;SIFT: NA;Polyphen-2: NA	Missense_Mutation	SNP	Amp		.	.	.	17	80196778	80196778	G	A	17:g.80196778G>A	ENST00000392339.1:c.1324G>A	0.23		24	79		123	1844	45051					53	STAGE I	5TH	3	SKCM	2785	-19372	0			91.5606	0:ALIVE OR DEAD TUMOR FREE	Not Hispanic Or Latino	2001-08-13	0.3075		No
Skin Cutaneous Melanoma (TCGA, PanCancer Atlas)	TCGA-GF-A769-01	Melanoma	Cutaneous Melanoma	P210S	OncoKB: NA;CIViC: NA;MyCancerGenome: not present;CancerHotspot: no;3DHotspot: no	MutationAssessor: impact: neutral, score: 0.775;SIFT: impact: tolerated, score: 0.22;Polyphen-2: impact: benign, score: 0.005	Missense_Mutation	SNP			.	.	.	17	80195274	80195274	C	T	17:g.80195274C>T	ENST00000392339.1:c.628C>T	0.2		5	20		12	121	45021					39	STAGE IIC	7TH	13	SKCM		-14304	0			35.1777	1:DEAD WITH TUMOR	Not Hispanic Or Latino	1/23/14	0.3531		No
Skin Cutaneous Melanoma (TCGA, PanCancer Atlas)	TCGA-EE-A2MD-06	Melanoma	Cutaneous Melanoma	G405C	OncoKB: NA;CIViC: NA;MyCancerGenome: not present;CancerHotspot: no;3DHotspot: no	MutationAssessor: impact: low, score: 1.675;SIFT: NA;Polyphen-2: NA	Missense_Mutation	SNP	Gain		.	.	.	17	80196667	80196667	G	T	17:g.80196667G>T	ENST00000392339.1:c.1213G>T	0.08		3	35		58	2171	45051					52	STAGE II	5TH	8	SKCM		-19333	0			47.2762	1:DEAD WITH TUMOR	Not Hispanic Or Latino	12/21/12	0.2798		No
Skin Cutaneous Melanoma (TCGA, PanCancer Atlas)	TCGA-ER-A1A1-06	Melanoma	Cutaneous Melanoma	P245Q	OncoKB: NA;CIViC: NA;MyCancerGenome: not present;CancerHotspot: no;3DHotspot: no	MutationAssessor: impact: high, score: 3.835;SIFT: impact: deleterious, score: 0;Polyphen-2: impact: probably_damaging, score: 1	Missense_Mutation	SNP	Diploid		.	.	.	17	80195380	80195380	C	A	17:g.80195380C>A	ENST00000392339.1:c.734C>A	0.11		3	24		24	695	45021					58	STAGE IIIC	6TH	0	SKCM	3196	-21209	0			105.073	0:ALIVE OR DEAD TUMOR FREE	Not Hispanic Or Latino	4/23/12	0.0008		No
Stomach Adenocarcinoma (TCGA, PanCancer Atlas)	TCGA-CD-8531-01	Esophagogastric Cancer	Diffuse Type Stomach Adenocarcinoma	G75D	OncoKB: NA;CIViC: NA;MyCancerGenome: not present;CancerHotspot: no;3DHotspot: no	MutationAssessor: impact: high, score: 3.66;SIFT: impact: deleterious, score: 0;Polyphen-2: impact: probably_damaging, score: 1	Missense_Mutation	SNP	Diploid	1	.	.	.	17	80194605	80194605	G	A	17:g.80194605G>A	ENST00000392339.1:c.224G>A	0.44		28	35		193	232	44990					66	STAGE IIIA	6TH	1	STAD	383	-24453	0	12.5916	0:DiseaseFree	12.5916	0:ALIVE OR DEAD TUMOR FREE	Not Hispanic Or Latino	4/15/13	0.0474	G3	No
Stomach Adenocarcinoma (TCGA, PanCancer Atlas)	TCGA-BR-8487-01	Esophagogastric Cancer	Stomach Adenocarcinoma	R216H	OncoKB: NA;CIViC: NA;MyCancerGenome: not present;CancerHotspot: no;3DHotspot: no	MutationAssessor: impact: low, score: 1.29;SIFT: impact: tolerated, score: 0.06;Polyphen-2: impact: benign, score: 0.017	Missense_Mutation	SNP	Diploid	2	.	.	.	17	80195293	80195293	G	A	17:g.80195293G>A	ENST00000392339.1:c.647G>A	0.31		4	9		9	2687	45021					64	STAGE IIA	7TH	4	STAD	34	-23400	0	1.1178	0:DiseaseFree	1.1178	0:ALIVE OR DEAD TUMOR FREE	Not Hispanic Or Latino	2009-11-12	0.1111	G3	No
Stomach Adenocarcinoma (TCGA, PanCancer Atlas)	TCGA-HU-A4H4-01	Esophagogastric Cancer	Tubular Stomach Adenocarcinoma	A264V	OncoKB: NA;CIViC: NA;MyCancerGenome: not present;CancerHotspot: no;3DHotspot: no	MutationAssessor: impact: medium, score: 2.91;SIFT: impact: deleterious, score: 0;Polyphen-2: impact: probably_damaging, score: 1	Missense_Mutation	SNP	Diploid	1	.	.	.	17	80195437	80195437	C	T	17:g.80195437C>T	ENST00000392339.1:c.791C>T	0.29		19	46		70	576	45021					53	STAGE IIB	7TH	12	STAD	725	-19665	0	23.8354	0:DiseaseFree	23.8354	0:ALIVE OR DEAD TUMOR FREE	Not Hispanic Or Latino	2003-10-13	0.1637	G3	No
Stomach Adenocarcinoma (TCGA, PanCancer Atlas)	TCGA-VQ-A8P2-01	Esophagogastric Cancer	Mucinous Stomach Adenocarcinoma	A253T	OncoKB: NA;CIViC: NA;MyCancerGenome: not present;CancerHotspot: no;3DHotspot: no	MutationAssessor: impact: high, score: 3.8;SIFT: impact: deleterious, score: 0;Polyphen-2: impact: probably_damaging, score: 0.99	Missense_Mutation	SNP	Diploid		.	.	.	17	80195403	80195403	G	A	17:g.80195403G>A	ENST00000392339.1:c.757G>A	0.09		3	32		32	6364	45021					68	STAGE IIIA	7TH	2	STAD	1160	-25129	0	38.1366	0:DiseaseFree	38.1366	0:ALIVE OR DEAD TUMOR FREE		3/26/14	0.05	G2	No
Stomach Adenocarcinoma (TCGA, PanCancer Atlas)	TCGA-BR-A44U-01	Esophagogastric Cancer	Stomach Adenocarcinoma	D219N	OncoKB: NA;CIViC: NA;MyCancerGenome: not present;CancerHotspot: no;3DHotspot: no	MutationAssessor: impact: medium, score: 2.435;SIFT: impact: deleterious, score: 0.03;Polyphen-2: impact: probably_damaging, score: 1	Missense_Mutation	SNP	Gain	1	.	.	.	17	80195301	80195301	G	A	17:g.80195301G>A	ENST00000392339.1:c.655G>A	0.12		3	23		18	78	45021					70	STAGE IIIB	7TH	11	STAD	35	-25577	0	13.8738	0:DiseaseFree	13.8738	0:ALIVE OR DEAD TUMOR FREE	Not Hispanic Or Latino	2012-06-12	0.3073	G3	No
Stomach Adenocarcinoma (TCGA, PanCancer Atlas)	TCGA-CG-5723-01	Esophagogastric Cancer	Stomach Adenocarcinoma	V233M	OncoKB: NA;CIViC: NA;MyCancerGenome: not present;CancerHotspot: no;3DHotspot: no	MutationAssessor: impact: low, score: 1.705;SIFT: impact: tolerated, score: 0.09;Polyphen-2: impact: possibly_damaging, score: 0.748	Missense_Mutation	SNP	Diploid	1	.	.	.	17	80195343	80195343	G	A	17:g.80195343G>A	ENST00000392339.1:c.697G>A	0.21		5	19		23	1601	45021					83	STAGE II	5TH	0	STAD	3196	-30376	0			105.073	0:ALIVE OR DEAD TUMOR FREE		3/22/11	0.0158	G3	No
Stomach Adenocarcinoma (TCGA, PanCancer Atlas)	TCGA-VQ-A8PP-01	Esophagogastric Cancer	Tubular Stomach Adenocarcinoma	S464G	OncoKB: NA;CIViC: NA;MyCancerGenome: not present;CancerHotspot: no;3DHotspot: no	MutationAssessor: impact: medium, score: 2.125;SIFT: NA;Polyphen-2: NA	Missense_Mutation	SNP	Diploid		.	.	.	17	80196844	80196844	A	G	17:g.80196844A>G	ENST00000392339.1:c.1390A>G	0.39		24	38		61	1330	45051					76	STAGE IV	6TH	6	STAD		-27774	0			23.408	1:DEAD WITH TUMOR		3/30/14	0.1527	G2	No
Stomach Adenocarcinoma (TCGA, PanCancer Atlas)	TCGA-VQ-A91E-01	Esophagogastric Cancer	Tubular Stomach Adenocarcinoma	S354G	OncoKB: NA;CIViC: NA;MyCancerGenome: not present;CancerHotspot: no;3DHotspot: no	MutationAssessor: impact: medium, score: 2.105;SIFT: NA;Polyphen-2: NA	Missense_Mutation	SNP	Diploid		.	.	.	17	80195706	80195706	A	G	17:g.80195706A>G	ENST00000392339.1:c.1060A>G	0.2		8	33		34	737	45021					67	STAGE IIIB	7TH	15	STAD	664	-24549	0	21.8299	0:DiseaseFree	21.8299	0:ALIVE OR DEAD TUMOR FREE		4/23/14	0.0012	G3	No
Pancreatic Adenocarcinoma (TCGA, PanCancer Atlas)	TCGA-FB-A7DR-01	Pancreatic Cancer	Pancreatic Adenocarcinoma	R84C	OncoKB: NA;CIViC: NA;MyCancerGenome: not present;CancerHotspot: no;3DHotspot: no	MutationAssessor: impact: medium, score: 3.15;SIFT: impact: deleterious, score: 0;Polyphen-2: impact: probably_damaging, score: 0.967	Missense_Mutation	SNP	Diploid		.	.	.	17	80194631	80194631	C	T	17:g.80194631C>T	ENST00000392339.1:c.250C>T	0.13		86	597		90	35	44990					48	STAGE IIA	7TH	15	PAAD	166	-17649	0	11.6054	0:DiseaseFree	11.6054	1:DEAD WITH TUMOR	Not Hispanic Or Latino	11/13/13	0.0028	G2	No
Colorectal Adenocarcinoma (TCGA, PanCancer Atlas)	TCGA-A6-3809-01	Colorectal Cancer	Mucinous Adenocarcinoma of the Colon and Rectum	A234V	OncoKB: NA;CIViC: NA;MyCancerGenome: not present;CancerHotspot: no;3DHotspot: no	MutationAssessor: impact: medium, score: 2.595;SIFT: impact: deleterious, score: 0;Polyphen-2: impact: probably_damaging, score: 0.924	Missense_Mutation	SNP	Diploid		.	.	.	17	80195347	80195347	C	T	17:g.80195347C>T	ENST00000392339.1:c.701C>T	0.33		15	30		55	1165	45021					71	STAGE IIB	6TH	2	COAD	996	-26274	0			32.7448	0:ALIVE OR DEAD TUMOR FREE	Not Hispanic Or Latino	10/29/10			No
Colorectal Adenocarcinoma (TCGA, PanCancer Atlas)	TCGA-AY-6197-01	Colorectal Cancer	Colon Adenocarcinoma	F408del	OncoKB: NA;CIViC: NA;MyCancerGenome: not present;CancerHotspot: no;3DHotspot: no	MutationAssessor: NA;SIFT: NA;Polyphen-2: NA	In_Frame_Del	DEL	Diploid		.	.	.	17	80196672	80196674	CTT	-	17:g.80196672_80196674del	ENST00000392339.1:c.1223_1225del	0.17		34	161		45	1058	45051					60	STAGE IIA	7TH	3	COAD	652	-21957	0	21.4354	0:DiseaseFree	21.4354	0:ALIVE OR DEAD TUMOR FREE	Not Hispanic Or Latino	4/14/11	0.0897		No
Colorectal Adenocarcinoma (TCGA, PanCancer Atlas)	TCGA-G4-6586-01	Colorectal Cancer	Colon Adenocarcinoma	G101D	OncoKB: NA;CIViC: NA;MyCancerGenome: not present;CancerHotspot: no;3DHotspot: no	MutationAssessor: impact: high, score: 3.825;SIFT: impact: deleterious, score: 0;Polyphen-2: impact: probably_damaging, score: 1	Missense_Mutation	SNP	Diploid	1	.	.	.	17	80194683	80194683	G	A	17:g.80194683G>A	ENST00000392339.1:c.302G>A	0.28		17	43		73	1108	44990					73	STAGE IIA	6TH	1	COAD	1089	-27020	0			35.8023	0:ALIVE OR DEAD TUMOR FREE	Not Hispanic Or Latino	7/14/11	0.045		No
Head and Neck Squamous Cell Carcinoma (TCGA, PanCancer Atlas)	TCGA-CR-7402-01	Head and Neck Cancer	Head and Neck Squamous Cell Carcinoma	E363Rfs*38	OncoKB: NA;CIViC: NA;MyCancerGenome: not present;CancerHotspot: no;3DHotspot: no	MutationAssessor: NA;SIFT: NA;Polyphen-2: NA	Frame_Shift_Del	DEL	Diploid		.	.	.	17	80195732	80195732	G	-	17:g.80195732del	ENST00000392339.1:c.1087del	0.24		10	31		53	915	45021					68		6TH	9	HNSC	911	-25138	0	29.9504	0:DiseaseFree	29.9504	0:ALIVE OR DEAD TUMOR FREE	Not Hispanic Or Latino	2/28/12	0.2517	G2	No
Cervical Squamous Cell Carcinoma (TCGA, PanCancer Atlas)	TCGA-Q1-A5R3-01	Cervical Cancer	Cervical Squamous Cell Carcinoma	M344V	OncoKB: NA;CIViC: NA;MyCancerGenome: not present;CancerHotspot: no;3DHotspot: no	MutationAssessor: impact: low, score: 1.485;SIFT: NA;Polyphen-2: NA	Missense_Mutation	SNP	Gain		.	.	.	17	80195676	80195676	A	G	17:g.80195676A>G	ENST00000392339.1:c.1030A>G	0.42		44	61		41	60	45021					56		7TH	12	CESC	485	-20574	0	15.945	0:DiseaseFree	15.945	0:ALIVE OR DEAD TUMOR FREE	Not Hispanic Or Latino	4/26/13	0.2988	G2	No
Cervical Squamous Cell Carcinoma (TCGA, PanCancer Atlas)	TCGA-EA-A410-01	Cervical Cancer	Cervical Squamous Cell Carcinoma	A380V	OncoKB: NA;CIViC: NA;MyCancerGenome: not present;CancerHotspot: no;3DHotspot: no	MutationAssessor: impact: low, score: 1.475;SIFT: NA;Polyphen-2: NA	Missense_Mutation	SNP	Diploid		.	.	.	17	80196593	80196593	C	T	17:g.80196593C>T	ENST00000392339.1:c.1139C>T	0.64		7	4		10	1463	45051					51		2009	0	CESC	803	-18720	0	26.3997	0:DiseaseFree	26.3997	0:ALIVE OR DEAD TUMOR FREE	Not Hispanic Or Latino	9/24/12	0.0004	G2	No
[truncated: 38 more columns]
