# Supplementary material for: Comprehensive pan-cancer analysis identified SLC16A3 as a potential prognostic and diagnostic biomarker
Source: Cancer Cell Int. 2025 Apr 29;25:168. doi: 10.1186/s12935-025-03791-1 (PMC12039109; doi:10.1186/s12935-025-03791-1)
Supplement: Supplementary file 8 — Supplementary Material 8: SLC16A3 localization and expression under physiological conditions. (A) SLC16A3 mRNA expressions in human normal tissues from the GTEx database. (B) the subcellular localization of SLC16A3. [file 12935_2025_3791_MOESM8_ESM.xlsx]

## Sheet: Sheet1
Gene Symbol	Gene ID	PCC
ENO1	ENSG00000074800.13	0.57
PFKP	ENSG00000067057.16	0.54
LDHA	ENSG00000134333.13	0.53
TNIP1	ENSG00000145901.14	0.51
PKM	ENSG00000067225.17	0.51
PGK1	ENSG00000102144.13	0.5
MIR210HG	ENSG00000247095.2	0.5
SPAG4	ENSG00000061656.9	0.48
TPI1	ENSG00000111669.14	0.46
EGLN3	ENSG00000129521.13	0.46
FUT11	ENSG00000196968.10	0.45
OSMR	ENSG00000145623.12	0.45
P4HA1	ENSG00000122884.12	0.45
ANGPTL4	ENSG00000167772.11	0.43
HPCAL1	ENSG00000115756.12	0.43
DDIT4	ENSG00000168209.4	0.43
PGAM1	ENSG00000171314.8	0.42
MTFP1	ENSG00000242114.5	0.42
P4HA2	ENSG00000072682.18	0.42
MVP	ENSG00000013364.18	0.42
TRADD	ENSG00000102871.15	0.41
TNFRSF10B	ENSG00000120889.12	0.41
ITGA3	ENSG00000005884.17	0.41
NDUFA4L2	ENSG00000185633.10	0.41
ALDOA	ENSG00000149925.16	0.41
ADM	ENSG00000148926.9	0.4
EHD2	ENSG00000024422.11	0.39
S100A10	ENSG00000197747.8	0.39
GALNT14	ENSG00000158089.14	0.39
HLA-V	ENSG00000181126.13	0.39
ANXA2	ENSG00000182718.16	0.39
TGFA	ENSG00000163235.15	0.39
ANXA4	ENSG00000196975.14	0.39
CA9	ENSG00000107159.12	0.38
HILPDA	ENSG00000135245.9	0.38
NOL3	ENSG00000140939.14	0.37
IKBIP	ENSG00000166130.14	0.37
IGFBP3	ENSG00000146674.14	0.37
RHBDF2	ENSG00000129667.12	0.37
VEGFA	ENSG00000112715.20	0.37
ERRFI1	ENSG00000116285.12	0.37
TGM2	ENSG00000198959.11	0.37
CLIC1	ENSG00000213719.8	0.37
TRIP10	ENSG00000125733.17	0.37
ERO1L	ENSG00000197930.12	0.37
NRP1	ENSG00000099250.17	0.37
OCIAD2	ENSG00000145247.11	0.36
RNF149	ENSG00000163162.8	0.36
NNMT	ENSG00000166741.7	0.36
PLAUR	ENSG00000011422.11	0.36
INSIG2	ENSG00000125629.14	0.36
PLOD2	ENSG00000152952.11	0.36
CD68	ENSG00000129226.13	0.36
GAL3ST1	ENSG00000128242.12	0.36
ZNF395	ENSG00000186918.13	0.36
ADAM8	ENSG00000151651.15	0.36
DARS-AS1	ENSG00000231890.7	0.36
CDK18	ENSG00000117266.15	0.36
RP1-261G23.7	ENSG00000272114.1	0.35
GAPDH	ENSG00000111640.14	0.35
SEC14L6	ENSG00000214491.8	0.35
RALB	ENSG00000144118.13	0.35
PELO	ENSG00000152684.10	0.35
TNFRSF10D	ENSG00000173530.5	0.35
NDRG1	ENSG00000104419.14	0.35
IL4R	ENSG00000077238.13	0.35
ANXA2P2	ENSG00000231991.4	0.35
TMSB10	ENSG00000034510.5	0.35
TLR3	ENSG00000164342.12	0.35
RP11-274H2.3	ENSG00000240032.1	0.35
PLIN2	ENSG00000147872.9	0.35
C7orf49	ENSG00000122783.16	0.34
SNX33	ENSG00000173548.8	0.34
TCN2	ENSG00000185339.8	0.34
SPATS2L	ENSG00000196141.12	0.34
ITGB1	ENSG00000150093.18	0.34
FBXO17	ENSG00000269190.5	0.34
C4orf3	ENSG00000164096.12	0.34
BNIP3	ENSG00000176171.11	0.34
TNFRSF12A	ENSG00000006327.13	0.34
EPS8L2	ENSG00000177106.14	0.34
TMEM92	ENSG00000167105.7	0.34
EZR	ENSG00000092820.17	0.34
ENPEP	ENSG00000138792.9	0.34
PLOD1	ENSG00000083444.16	0.34
SLC15A4	ENSG00000139370.10	0.34
ADSSL1	ENSG00000185100.10	0.34
HIF1A-AS2	ENSG00000258667.1	0.34
LINC01320	ENSG00000228262.8	0.34
LINC00887	ENSG00000214145.6	0.33
AP001626.1	ENSG00000225431.1	0.33
IVNS1ABP	ENSG00000116679.15	0.33
ALPK2	ENSG00000198796.6	0.33
AP000695.4	ENSG00000233818.1	0.33
PDZK1IP1	ENSG00000162366.7	0.33
TAGLN2	ENSG00000158710.14	0.33
AC061992.2	ENSG00000267737.1	0.33
EPHA2	ENSG00000142627.12	0.33
PDK1	ENSG00000152256.13	0.33
IL15RA	ENSG00000134470.19	0.33
×
